# Supplementary material for: Structure-Based Rational Design of Prodrugs To Enable Their Combination with Polymeric Nanoparticle Delivery Platforms for Enhanced Antitumor Efficacy
Source: PubMed Central journal article supplement — Angew Chem Int Ed Engl. 2014 Sep 4;53(43):11532–7. doi: 10.1002/anie.201406685 (PMC4225468; doi:10.1002/anie.201406685), 2014-09-04
Supplement: anie0053-11532.sd1.pdf [file anie0053-11532.sd1.pdf]

Supporting Information

© Wiley-VCH 2014

69451 Weinheim, Germany

**Structure-Based Rational Design of Prodrugs to Enable Their  
Combination with Polymeric Nanoparticle Delivery Platforms for  
Enhanced Antitumor Efficacy\*\***

*Hangxiang Wang, Haiyang Xie, Jiaping Wu, Xuyong Wei, Lin Zhou, Xiao Xu,\* and  
Shusen Zheng\**

anie\_201406685\_sm\_miscellaneous\_information.pdf

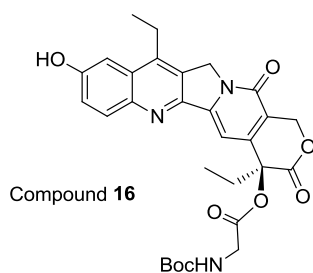

1  
2 **Figure S1** Compound 16 in which the Boc-Gly-OH was modified on 20-hydroxyl.

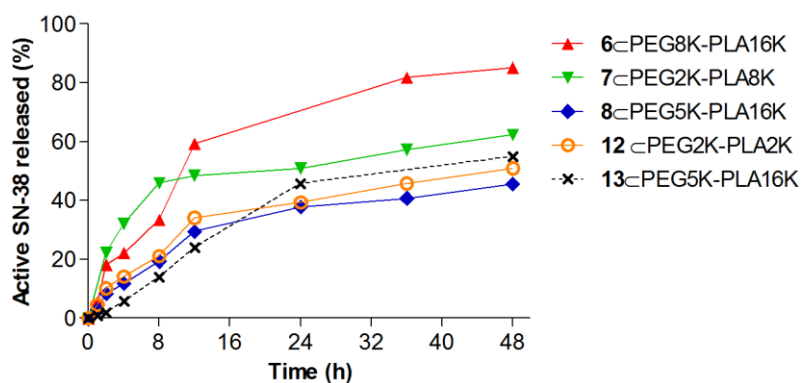

7  
8 **Figure S2** Free SN-38 release from PEG-PLA NPs in phosphate buffer solutions  
9 containing 0.2% Tween 80 at pH 7.4. The amounts of released active SN-38 were  
10 determined by HPLC analysis. The percentage of SN-38 released from the NPs  
11 and prodrugs was plotted against time and the cumulative amount of SN-38 was  
12 calculated.

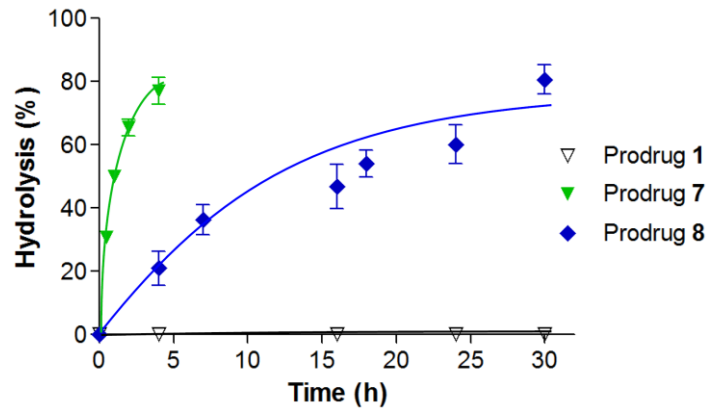

1

2 **Figure S3** Prodrug hydrolysis in phosphate buffer solutions containing 0.2%  
 3 Tween 80 at pH 7.4. The percentage of hydrolysis was determined by TLC  
 4 analysis and plotted against time.

5

6

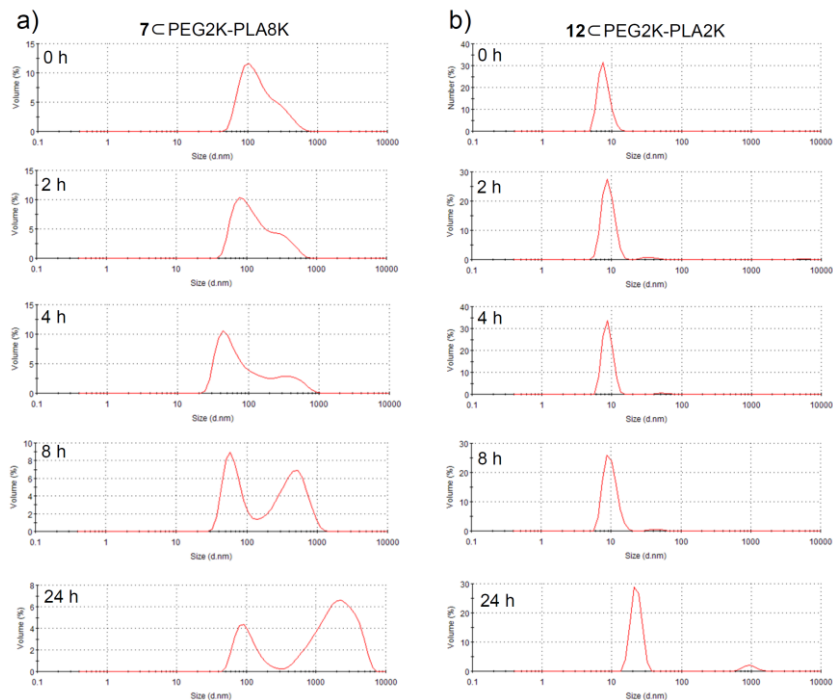

7

8 **Figure S4** Stability of prodrug 7 (a) and 12 (b)-encapsulated nanoparticles in  
 9 mouse serum. NPs with 0.2 mg/ml prodrugs were incubated in 50% mouse  
 10 serum for 0 h, 2 h, 4 h, 8 h and 24 h, respectively and then the hydrodynamic  
 11 diameters were measured by DLS.

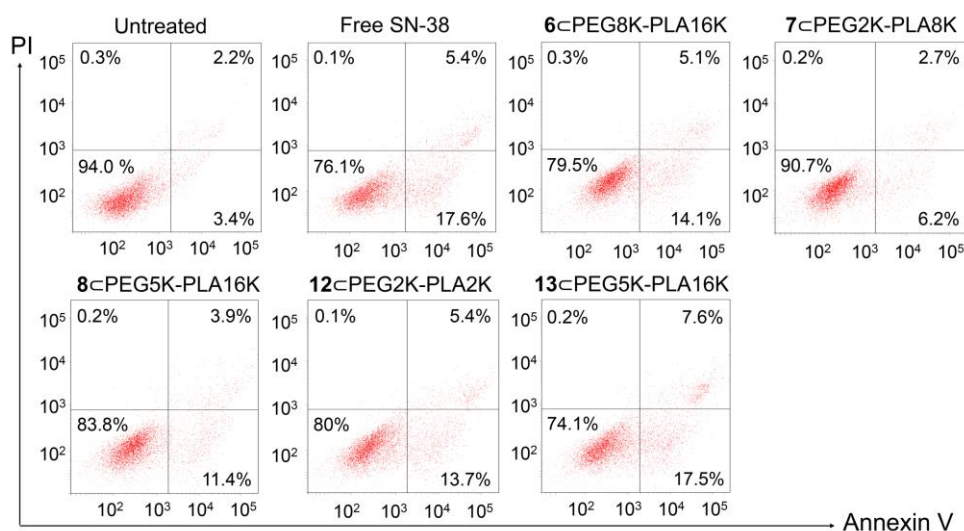

1

2 **Figure S5** Apoptotic analysis of HCT-116 cells determined by FACS using Alexa  
 3 Fluor<sup>®</sup> 488 Annexin V/PI staining kit after 12-h drug treatments. Four distinct  
 4 phenotypes: viable cells (lower left quadrant); early apoptotic cells (lower  
 5 right quadrant); late apoptotic cells (upper right quadrant); necrotic or dead  
 6 cells (upper left quadrant).

7

8

9 **Table S1** The maximum concentration of prodrugs **6**, **7**, **8**, **12**, and **13**  
 10 encapsulated in PEG-PLA polymeric nanoparticles.

|                         | Solubility (SN-38 equivalent) | Mean $d_h$ (nm) $\pm$ SD | Encapsulation efficiency (%) |
|-------------------------|-------------------------------|--------------------------|------------------------------|
| SN-38 in PEG-PLA        | <0.01 mg/mL                   | –                        | –                            |
| <b>6c</b> PEG8K-PLA16K  | 1.6 mg/mL                     | 41 $\pm$ 5               | 88                           |
| <b>7c</b> PEG2K-PLA8K   | >3.0 mg/mL                    | 82 $\pm$ 10              | 95                           |
| <b>8c</b> PEG5K-PLA16K  | 2.1 mg/mL                     | 45 $\pm$ 6               | 96                           |
| <b>12c</b> PEG2K-PLA2K  | 1.6 mg/mL                     | 20 $\pm$ 3               | 94                           |
| <b>13c</b> PEG5K-PLA16K | >3.0 mg/mL                    | 43 $\pm$ 4               | 97                           |

11

## 1    **General materials and methods for organic synthesis**

2    7-Ethyl-10-hydroxycamptothecin (SN-38) was purchased from Knowshine Pharmaceuticals  
3    Inc. (Shanghai, China). PEG-PLA copolymers were obtained from Advanced Polymer  
4    Materials Inc. (Montreal, Canada). 3-[4,5-dimethylthiazol-2-yl]-3,5-diphenyl tetrazolium  
5    bromide (MTT) was purchased from Aladdin (Shanghai, China). All other compounds and  
6    solvents were purchased from J&K Chemical (Shanghai, China). Alexa Fluor<sup>®</sup> 488 Annexin  
7    V/PI apoptosis assay kit and cell culture reagents were purchased from Life Technologies  
8    (Shanghai, China).

9    All reactions were performed in a dry atmosphere. Thin layer chromatography (TLC) was  
10    performed on silica gel 60 F<sub>254</sub> pre-coated aluminium sheets (Merck) and visualized by  
11    fluorescence quenching. Chromatographic purification was accomplished Using flash  
12    column chromatography on silica gel (neutral, Qingdao Haiyang Chemical Co., Ltd). <sup>1</sup>H  
13    NMR spectra were recorded in CDCl<sub>3</sub> or DMSO-d<sub>6</sub> on a Bruker 400 (400 MHz) spectrometer  
14    and calibrated to the residual solvent peak or tetramethylsilane (= 0 ppm). Multiplicities  
15    are abbreviated as follows: s = singlet, d = doublet, t = triplet, q = quartet, m = multiplet,  
16    dd = double doublet, dt = double triplet, br = broad. High-resolution mass spectrometry  
17    (HRMS)-ESI was recorded on Agilent 6460 LC/QQQ MS instruments. Reverse phase HPLC  
18    (RP-HPLC) was carried out on a Hitachi Chromaster 5000 system, and a YMC-Pack ODS-A  
19    column (5 μm, 250 × 4.6 mm) at a flow rate of 1.0 mL/min. UV detection for SN-38 was at  
20    378 nm. All runs used linear gradients of acetonitrile (solvent A) and water (solvent B)  
21    containing 0.1% TFA.

22

## 1 Synthesis of SN-38 prodrugs 1-16

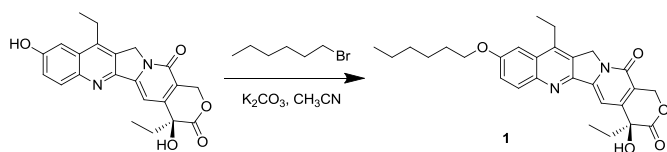

2

### 3 Supplementary Scheme 1 Synthetic scheme of 1

4 To a solution of 1-bromohexane (215  $\mu$ L, 1.5 mmol) and SN-38 (500 mg, 1.3 mmol) in 30  
5 mL of  $CH_3CN$  were added anhydrous  $K_2CO_3$  (352 mg, 2.5 mmol). The reaction mixture was  
6 heated to reflux for overnight. The reaction mixture was filtered to remove  $K_2CO_3$ , and  
7 then the solvent was evaporated under vacuum. The residual solid was purified with flash  
8 chromatography (DCM:MeOH = 75:1) to give compound 1 (336 mg, 55%).

9  $^1H$  NMR (400 MHz,  $CDCl_3$ ): 0.91-0.95 (t, 3H), 1.00-1.04 (t, 3H), 1.25 (t, 3H), 1.35-1.42 (m,  
10 6H), 1.86-1.92 (m, 4H), 3.12-3.18 (q, 2H), 4.11-4.14 (t, 2H), 5.23 (s, 2H), 5.27-5.31 (d, 1H,  
11  $J = 16.4$ ), 5.71-5.75 (d, 1H,  $J = 16.4$ ), 7.29 (s, 1H), 7.44-7.46 (d, 1H,  $J = 9.2$ ), 7.45-7.47 (d,  
12 1H,  $J = 9.2$ ), 7.69 (s, 1H).

13 HR-ESI Qq-LTMS: calcd for  $C_{28}H_{32}N_2O_5$   $[M+H]^+$  = 475.2232; obsd 475.2275.

14

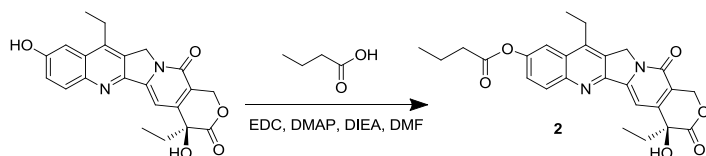

15

### 16 Supplementary Scheme 2 Synthetic scheme of 2

17 To a solution of n-butanoic acid (116  $\mu$ L, 1.3 mmol) and SN-38 (500 mg, 1.3 mmol) in 28  
18 mL of anhydrous DMF were added EDC·HCl (267 mg, 1.4 mmol) and DMAP (172 mg, 1.4  
19 mmol) and DIEA (232  $\mu$ L, 1.4 mmol). The reaction mixture was stirred at 25  $^\circ$ C overnight.  
20 After removing the solvent, DCM was added and washed with washed with 5% citric acid,  
21 saturated  $NaHCO_3$  and brine. The organic layer was dried over anhydrous  $Na_2SO_4$ , filtered,  
22 and evaporated under vacuum. The residue was purified by flash column chromatography  
23 on silica gel (DCM:MeOH = 75:1) to give compound 2 (350 mg, 59%).

24  $^1H$  NMR (400 MHz,  $CDCl_3$ ):  $\delta$  1.02-1.05 (t, 3H), 1.08-1.12 (t, 3H), 1.42 (t, 3H), 1.83-1.90 (m,  
25 4H), 2.64-2.67 (t, 2H), 3.18-3.20 (t, 2H), 5.30 (s, 2H), 5.28-5.32 (d, 1H,  $J = 16$ ), 5.71-5.75  
26 (d, 1H,  $J = 16.4$ ), 7.57-7.59 (d, 1H,  $J = 7.6$ ), 7.84 (s, 1H), 7.86 (s, 1H), 8.35-8.37 (d, 1H,  $J =$   
27 8.4).

28 HR-ESI Qq-LTMS: calcd for  $[C_{26}H_{27}N_2O_6]^+$   $[M+H]^+$  = 463.1864; obsd 463.1893.

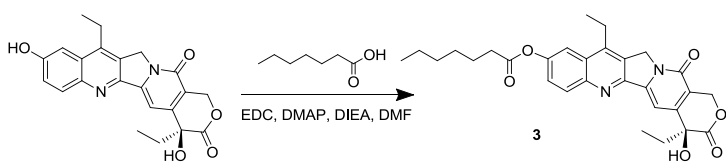

1  
2 **Supplementary Scheme 3 Synthetic scheme of 3**

3 To a solution of heptanoic acid (108  $\mu$ L, 0.76 mmol) and SN-38 (300 mg, 0.76 mmol) in  
4 20 mL of anhydrous DMF were added EDC·HCl (160 mg, 0.84 mmol) and DMAP (103 mg, 0.84  
5 mmol) and DIEA (149  $\mu$ L, 0.84 mmol). The reaction mixture was stirred at 25  $^{\circ}$ C overnight.  
6 After removing the solvent, DCM was added and washed with washed with 5% citric acid,  
7 saturated  $\text{NaHCO}_3$  and brine. The organic layer was dried over anhydrous  $\text{Na}_2\text{SO}_4$ , filtered,  
8 and evaporated under vacuum. The residue was purified by flash column chromatography  
9 on silica gel (DCM:MeOH = 75:1) to give compound **3** (157 mg, 41%).

10  $^1\text{H}$  NMR (400 MHz,  $\text{CDCl}_3$ ):  $\delta$  0.91-0.94 (t, 3H), 1.00-1.04 (t, 3H), 1.35-1.41 (m, 6H),  
11 1.43-1.49 (t, 3H), 1.80-1.91 (m, 4H), 2.64-2.68 (t, 2H), 3.17-3.18 (q, 2H), 5.27 (s, 2H),  
12 5.27-5.31 (d, 1H,  $J = 16.4$ ), 5.70-5.74 (d, 1H,  $J = 16.4$ ), 7.54-7.56 (d, 1H,  $J = 7.6$ ), 7.79 (s,  
13 1H), 7.83 (s, 1H) 8.29-8.31 (d, 1H,  $J = 9.2$ ).

14 HR-ESI Qq-LTMS: calcd for  $[\text{C}_{29}\text{H}_{33}\text{N}_2\text{O}_6]^+ [\text{M}+\text{H}]^+ = 505.2333$ ; obsd 505.2289.

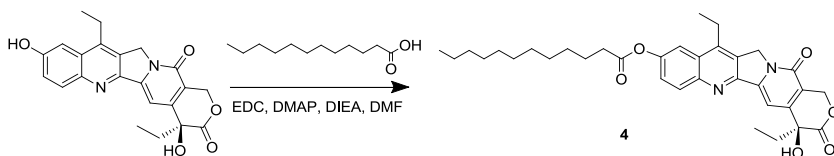

16  
17 **Supplementary Scheme 4 Synthetic scheme of 4**

18 To a solution of dodecanoic acid (153 mg, 0.76 mmol) and SN-38 (300 mg, 0.76 mmol) in  
19 20 mL of anhydrous DMF were added EDC·HCl (160 mg, 0.84 mmol) and DMAP (103 mg, 0.84  
20 mmol) and DIEA (149  $\mu$ L, 0.84 mmol). The reaction mixture was stirred at 25  $^{\circ}$ C overnight.  
21 After removing the solvent, DCM was added and washed with washed with 5% citric acid,  
22 saturated  $\text{NaHCO}_3$  and brine. The organic layer was dried over anhydrous  $\text{Na}_2\text{SO}_4$ , filtered,  
23 and evaporated under vacuum. The residue was purified by flash column chromatography  
24 on silica gel (DCM:MeOH = 100:1) to give compound **4** (220 mg, 50%).

25  $^1\text{H}$  NMR (400 MHz,  $\text{CDCl}_3$ ):  $\delta$  0.86-0.90 (t, 3H), 1.01-1.05 (t, 3H), 1.25-1.35 (m, 16H),  
26 1.40-1.43 (t, 3H), 1.78-1.91 (m, 4H), 2.64-2.68 (t, 2H), 3.15-3.22 (q, 2H), 5.30 (s, 2H),  
27 5.27-5.31 (d, 1H,  $J = 16.4$ ), 5.70-5.74 (d, 1H,  $J = 16.4$ ), 7.56-7.58 (d, 1H,  $J = 7.6$ ), 7.85 (s,  
28 1H), 7.86 (s, 1H), 8.34-8.37 (d, 1H,  $J = 9.2$ ).

29 HR-ESI Qq-LTMS: calcd for  $[\text{C}_{34}\text{H}_{43}\text{N}_2\text{O}_6]^+ [\text{M}+\text{H}]^+ = 575.3116$ ; obsd 575.3091.

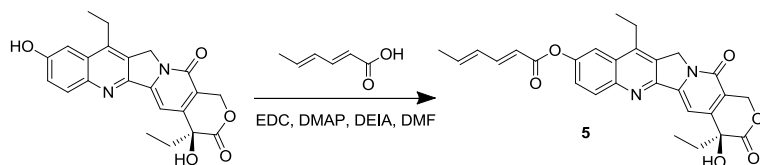

3 **Supplementary Scheme 5 Synthetic scheme of 5**

4 To a solution of sorbic acid (85.7 mg, 0.76 mmol) and SN-38 (300 mg, 0.76 mmol) in 10  
 5 mL of anhydrous DMF were added EDC·HCl (160 mg, 0.84 mmol) and DMAP (103 mg, 0.84  
 6 mmol) and DIEA (149  $\mu$ L, 0.84 mmol). The reaction mixture was stirred at 30  $^{\circ}$ C overnight.  
 7 After removing the solvent, DCM was added and washed with washed with 5% citric acid,  
 8 saturated  $\text{NaHCO}_3$  and brine. The organic layer was dried over anhydrous  $\text{Na}_2\text{SO}_4$ , filtered,  
 9 and evaporated under vacuum. The residue was purified by flash column chromatography  
 10 on silica gel (DCM:MeOH = 100:1) to give compound 5 (160 mg, 43%).

11  $^1\text{H}$  NMR (400 MHz,  $\text{CDCl}_3$ ):  $\delta$  1.02-1.06 (t, 3H), 1.39-1.42 (t, 3H), 1.87-1.94 (m, 5H),  
 12 3.14-3.18 (q, 2H), 5.27 (s, 2H), 5.30-5.34 (d, 1H,  $J = 16.0$ ), 5.72-5.76 (d, 1H,  $J = 16.0$ ),  
 13 6.02-6.06 (d, 1H,  $J = 15.2$ ), 6.31-6.34 (m, 2H), 7.50-7.56 (m, 1H), 7.59-7.61 (d, 1H,  $J = 9.2$ ),  
 14 7.68 (s, 1H), 7.87 (s, 1H), 8.23-8.25 (d, 1H,  $J = 8.8$ ).

15 HR-ESI Qq-LTMS: calcd for  $[\text{C}_{28}\text{H}_{27}\text{N}_2\text{O}_6]^+ [\text{M}+\text{H}]^+ = 487.1864$ ; obsd 487.1859.

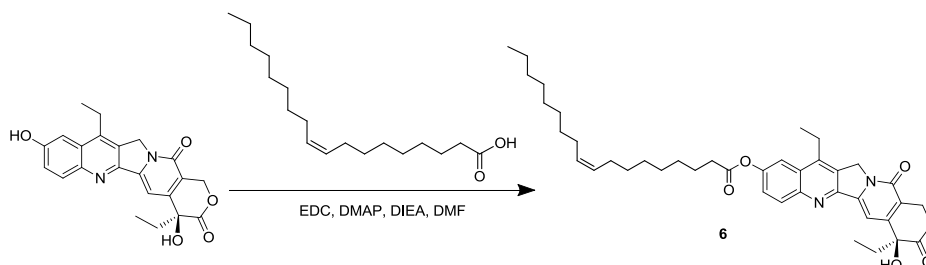

18 **Supplementary Scheme 6 Synthetic scheme of 6**

19 To a solution of oleic acid (21 mg, 0.076 mmol) and SN-38 (30 mg, 0.076 mmol) in 2 mL  
 20 of anhydrous DMF were added EDC·HCl (16 mg, 0.084 mmol) and DMAP (10 mg, 0.084  
 21 mmol) and DIEA (15  $\mu$ L, 0.084 mmol). The reaction mixture was stirred at 25  $^{\circ}$ C overnight.  
 22 After removing the solvent, DCM was added and washed with washed with 5% citric acid,  
 23 saturated  $\text{NaHCO}_3$  and brine. The organic layer was dried over anhydrous  $\text{Na}_2\text{SO}_4$ , filtered,  
 24 and evaporated under vacuum. The residue was purified by flash column chromatography  
 25 on silica gel (DCM:MeOH = 100:1) to give compound 6 (26 mg, 52%).

26  $^1\text{H}$  NMR (400 MHz,  $\text{CDCl}_3$ ):  $\delta$  0.79-0.82 (t, 3H), 0.95-0.99 (t, 3H), 1.20-1.32 (m, 23H),  
 1.73-1.95 (m, 4H), 1.99-2.04 (m, 4H), 2.64-2.68 (t, 2H), 3.15-3.21 (q, 2H), 5.28 (s, 2H),



1 5.30-5.37 (m, 2H), 5.32-5.36 (d, 1H,  $J = 14.8$ ), 5.72-5.76 (d, 1H,  $J = 16.4$ ), 7.55-7.57 (d, 1H,  
2  $J = 7.6$ ), 7.58 (s, 1H), 7.85 (s, 1H), 8.32-8.34 (d, 1H,  $J = 9.2$ ).

3 HR-ESI Qq-LTMS: calcd for  $[C_{40}H_{53}N_2O_6]^+$   $[M+H]^+$  = 657.3898; obsd 657.3831.

4

5 The synthesis of compound **7** has been reported previously.<sup>51</sup>

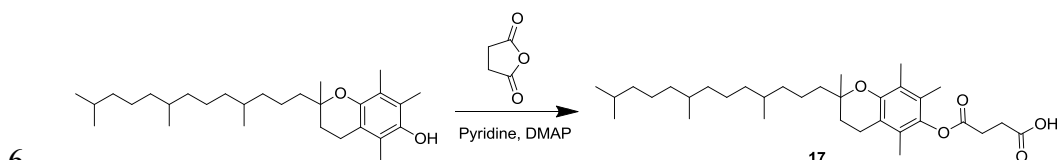

### 7 Supplementary Scheme 7 Synthetic scheme of **17**

8 To a solution of vitamin E (1.2 g, 3 mmol) and succinic anhydride (0.902 g, 9 mmol) in  
9 10 mL of anhydrous pyridine were added DMAP (367 mg, 3 mmol). The reaction mixture  
10 was stirred at 25 °C overnight. After removing the solvent, DCM was added and washed  
11 with 0.1 N HCl and brine. The organic layer was dried over anhydrous  $Na_2SO_4$ , filtered, and  
12 evaporated under vacuum. The residue was purified by flash column chromatography on  
13 silica gel (DCM:MeOH = 100:1) to give compound **17** (1.5 g, 94%).

14  $^1H$  NMR (400 MHz,  $CDCl_3$ ):  $\delta$  0.85-0.87 (m, 12H), 1.06-1.16 (m, 6H), 1.23-1.39 (m, 16H),  
15 1.52-1.54 (m, 2H), 1.96 (s, 3H), 2.01 (s, 3H), 2.08 (s, 3H), 2.56-2.59 (t, 2H), 2.82-2.84 (t,  
16 2H), 2.91-2.94 (t, 2H), 3.00 (t, 2H).

17

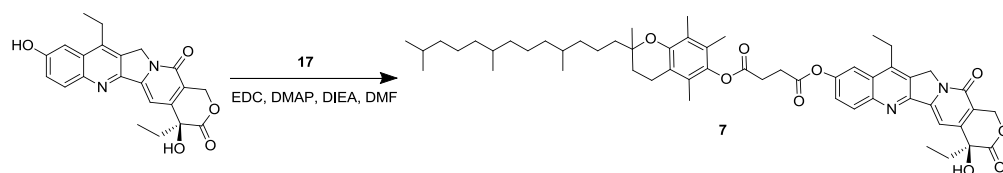

19

### 19 Supplementary Scheme 8 Synthetic scheme of **7**

20 To a solution of **17** (240 mg, 0.452 mmol) and SN-38 (177 mg, 0.452 mmol) in 10 mL of  
21 anhydrous DMF were added EDC·HCl (100 mg, 0.52 mmol) and DMAP (61 mg, 0.5 mmol) and  
22 pyridine (100  $\mu$ L, 0.5 mmol). The reaction mixture was stirred at 25 °C overnight. After  
23 removing the solvent, DCM was added and washed with washed with 5% citric acid,  
24 saturated  $NaHCO_3$  and brine. The organic layer was dried over anhydrous  $Na_2SO_4$ , filtered,  
25 and evaporated under vacuum. The residue was purified by flash column chromatography  
26 on silica gel (DCM:MeOH = 100:1) to give compound **7** (285 mg, 70%).

27  $^1H$  NMR (400 MHz,  $CDCl_3$ ):  $\delta$  0.85-0.87 (m, 12H), 1.03-1.06 (t, 3H), 1.03-1.14 (m, 6H),

1 1.23-1.38 (m, 16H), 1.35-1.39 (t, 3H), 1.52-1.59 (m, 2H), 1.77-1.92 (m, 2H), 1.99 (s, 3H),  
2 2.04 (s, 3H), 2.09 (s, 3H), 2.57-2.60 (t, 2H), 3.11-3.16 (t, 6H), 3.48-3.50 (q, 2H), 5.25 (s,  
3 2H), 5.29-5.33 (d, 1H,  $J = 16$ ), 5.74-5.578 (d, 1H,  $J = 16.4$ ), 7.55-7.58 (d, 1H,  $J = 9.2$ ),  
4 7.65 (s, 1H), 7.81 (s, 1H), 8.22-8.24 (d, 1H,  $J = 8.8$ ).  
5 HR-ESI Qq-LTMS: calcd for  $[C_{56}H_{76}N_2O_9]^+$   $[M+H]^+$  =905.5311; obsd 905.5276.  
6

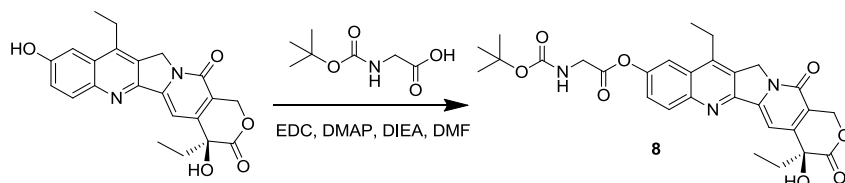

8 **Supplementary Scheme 9 Synthetic scheme of 8**

9 To a solution of Boc-Gly-OH (144.8 mg, 0.76 mmol) and SN-38 (300 mg, 0.76 mmol) in 20  
10 mL of anhydrous DMF were added EDC·HCl (160 mg, 0.84 mmol) and DMAP (103 mg, 0.84  
11 mmol) and DIEA (139  $\mu$ L, 0.84 mmol). The reaction mixture was stirred at 25  $^{\circ}$ C overnight  
12 and then the solvent was evaporated under vacuum. The residue was dissolved in ethyl  
13 acetate and washed with 5% citric acid, saturated  $NaHCO_3$  and brine. The organic layer  
14 was dried over anhydrous  $Na_2SO_4$ , filtered, and evaporated under vacuum. The residue was  
15 purified by flash column chromatography on silica gel (DCM:MeOH = 75:1) to give  
16 compound **8** (242 mg, 58%).

17  $^1H$  NMR (400 MHz,  $CDCl_3$ ):  $\delta$  0.97-1.06 (t, 3H), 1.37-1.40 (t, 3H), 1.50 (s, 9H), 1.86-1.94 (m,  
18 2H), 3.14-3.17 (q, 2H), 4.27-4.28 (d, 2H,  $J = 5.6$ ), 5.16 (br, 1H), 5.26 (s, 2H), 5.39-5.43 (d,  
19 1H,  $J = 17.2$ ), 5.74-5.78 (d, 1H,  $J = 16.4$ ), 7.55-7.58 (d, 1H,  $J = 7.6$ ), 7.64 (s, 1H), 7.85 (s,  
20 1H), 8.22-8.24 (d, 1H,  $J = 9.2$ ).

21 HR-ESI Qq-LTMS: calcd for  $[C_{29}H_{32}N_3O_8]^+$   $[M+H]^+$  =550.2184; obsd 550.2222.  
22  
23

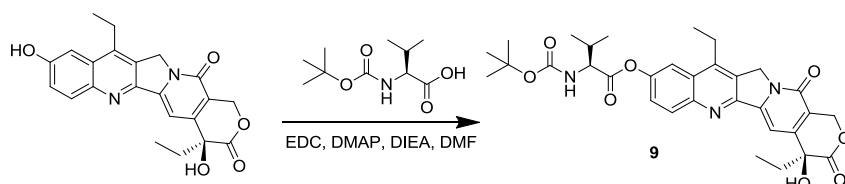

25 **Supplementary Scheme 10 Synthetic scheme of 9**

26 To a solution of Boc-Val-OH (166 mg, 0.76 mmol) and SN-38 (300 mg, 0.76 mmol) in 20  
27 mL of anhydrous DMF were added EDC·HCl (160 mg, 0.84 mmol) and DMAP (103 mg, 0.84

1 mmol) and DIEA (139  $\mu$ L, 0.84 mmol). The reaction mixture was stirred at 25  $^{\circ}$ C overnight.  
2 After removing the solvent, DCM was added and washed with washed with 5% citric acid,  
3 saturated  $\text{NaHCO}_3$  and brine. The organic layer was dried over anhydrous  $\text{Na}_2\text{SO}_4$ , filtered,  
4 and evaporated under vacuum. The residue was purified by flash column chromatography  
5 on silica gel (DCM:MeOH = 50:1) to give compound **9** (215 mg, 46.4%).

6  $^1\text{H}$  NMR (400 MHz, DMSO):  $\delta$  0.87-0.93 (t, 3H), 1.05-1.07 (d, 6H,  $J$  = 6.4), 1.27-1.31 (t, 3H),  
7 1.45 (s, 9H), 1.86-1.90 (m, 2H), 2.24-2.29 (m, 1H), 4.09-4.17 (m, 1H), 3.15-3.20 (m, 2H),  
8 5.34 (s, 2H), 5.44 (s, 2H), 7.24 (s, 1H), 7.55-7.57 (d, 1H,  $J$  = 7.2), 7.90 (s, 1H), 8.23-8.25 (d,  
9 1H,  $J$  = 9.2).

10 HR-ESI Qq-LTMS: calcd for  $[\text{C}_{32}\text{H}_{38}\text{N}_3\text{O}_8]^+$   $[\text{M}+\text{H}]^+$  = 592.2653; obsd 592.2637.

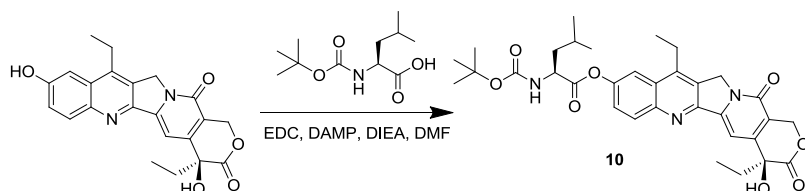

### 13 Supplementary Scheme 11 Synthetic scheme of **10**

14 To a solution of Boc-Leu-OH (318 mg, 1.3 mmol) and SN-38 (500 mg, 1.3 mmol) in 25 mL  
15 of anhydrous DMF were added EDC $\cdot$ HCl (269 mg, 1.4 mmol) and DMAP (171.4 mg, 1.4  
16 mmol) and DIEA (232  $\mu$ L, 1.4 mmol). The reaction mixture was stirred at 25  $^{\circ}$ C overnight.  
17 After removing the solvent, DCM was added and washed with washed with 5% citric acid,  
18 saturated  $\text{NaHCO}_3$  and brine. The organic layer was dried over anhydrous  $\text{Na}_2\text{SO}_4$ , filtered,  
19 and evaporated under vacuum. The residue was purified by flash column chromatography  
20 on silica gel (DCM:MeOH = 80:1) to give compound **10** (540 mg, 77%).

21  $^1\text{H}$  NMR (400 MHz,  $\text{CDCl}_3$ ):  $\delta$  1.02-1.04 (t, 3H), 1.06-1.08 (m, 6H), 1.39-1.43 (t, 3H), 1.49 (s,  
22 9H), 1.72-1.77 (m, 1H), 1.86-1.93 (m, 4H), 2.11 (s, 1H), 3.15-3.20 (q, 2H), 4.59 (br s, 1H),  
23 5.31 (s, 2H), 5.30-5.34 (d, 1H,  $J$  = 16.4), 5.71-5.75 (d, 1H,  $J$  = 16.4), 7.56-7.58 (d, 2H,  $J$  =  
24 9.2), 7.68 (s, 1H), 7.86 (s, 1H), 8.22-8.25 (d, 2H,  $J$  = 9.2).

25 HR-ESI Qq-LTMS: calcd for  $[\text{C}_{33}\text{H}_{40}\text{N}_3\text{O}_8]^+$   $[\text{M}+\text{H}]^+$  = 606.2810; obsd 606.2788.

26

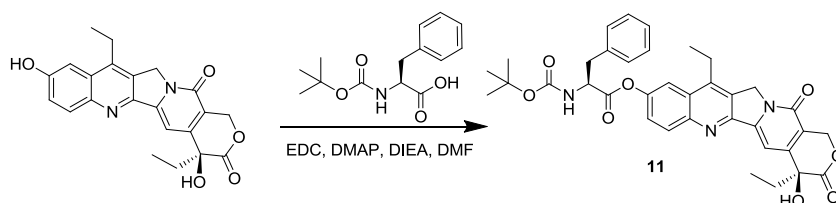

1

2 **Supplementary Scheme 12 Synthetic scheme of 11**

3 To a solution of Boc-Phe-OH (340 mg, 1.3 mmol) and SN-38 (500 mg, 1.3 mmol) in 25 mL  
 4 of anhydrous DMF were added EDC·HCl (269 mg, 1.4 mmol) and DMAP (171.4 mg, 1.4  
 5 mmol) and DIEA (232  $\mu$ L, 1.4 mmol). The reaction mixture was stirred at 25  $^{\circ}$ C overnight.  
 6 After removing the solvent, DCM was added and washed with washed with 5% citric acid,  
 7 saturated NaHCO<sub>3</sub> and brine. The organic layer was dried over anhydrous Na<sub>2</sub>SO<sub>4</sub>, filtered,  
 8 and evaporated under vacuum. The residue was purified by flash column chromatography  
 9 on silica gel (DCM:MeOH = 75:1) to give compound 11 (450 mg, 55%).

10 <sup>1</sup>H NMR (400 MHz, CDCl<sub>3</sub>):  $\delta$  1.00-1.04 (t, 3H), 1.24-1.26 (t, 3H), 1.46 (s, 9H), 1.90-1.94 (m,  
 11 2H), 3.11-3.16 (q, 2H), 3.25-3.29 (m, 3H), 4.84 (s, 1H), 5.32 (s, 2H), 5.32-5.36 (d, 1H, *J* =  
 12 16.8), 5.69-5.74 (d, 1H, *J* = 16.8), 7.33-7.38 (m, 5H), 7.40-7.42 (d, 1H, *J* = 7.6), 7.63 (s,  
 13 1H), 7.68 (s, 1H), 8.18-8.20 (d, 1H, *J* = 9.6).

14 HR-ESI Qq-LTMS: calcd for [C<sub>36</sub>H<sub>38</sub>N<sub>3</sub>O<sub>8</sub>]<sup>+</sup> [M+H]<sup>+</sup> = 640.2653; obsd 640.2634.

15

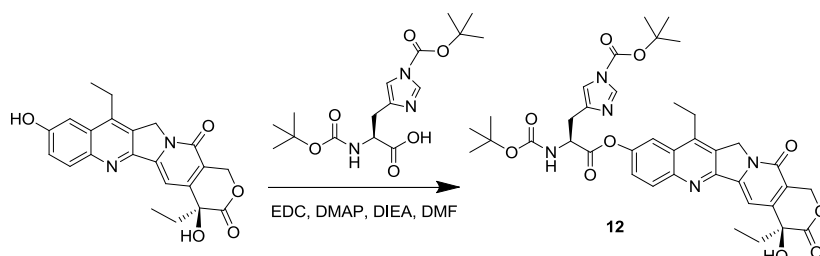

16

17 **Supplementary Scheme 13 Synthetic scheme of 12**

18 To a solution of Boc-His(Boc)-OH (433 mg, 1.3 mmol) and SN-38 (500 mg, 1.3 mmol) in  
 19 25 mL of anhydrous DMF were added EDC·HCl (269 mg, 1.4 mmol) and DMAP (171.4 mg, 1.4  
 20 mmol) and DIEA (232  $\mu$ L, 1.4 mmol). The reaction mixture was stirred at 25  $^{\circ}$ C overnight.  
 21 After removing the solvent, DCM was added and washed with washed with 5% citric acid,  
 22 saturated NaHCO<sub>3</sub> and brine. The organic layer was dried over anhydrous Na<sub>2</sub>SO<sub>4</sub>, filtered,  
 23 and evaporated under vacuum. The residue was purified by flash column chromatography  
 24 on silica gel (DCM:MeOH = 75:1) to give compound 12 (575 mg, 62.8%).

25 <sup>1</sup>H NMR (400 MHz, CDCl<sub>3</sub>):  $\delta$  1.02-1.06 (t, 3H), 1.38-1.42 (t, 3H), 1.48 (s, 9H), 1.63 (s, 9H),  
 26 1.86-1.94 (m, 2H), 3.12-3.18 (q, 2H), 3.49-3.78 (m, 2H), 4.90 (m, 1H), 5.26 (s, 2H),

1 5.29-5.33 (d, 1H,  $J = 16.0$ ), 5.74-5.78 (d, 1H,  $J = 16.4$ ), 7.29 (s, 1H), 7.59-7.61 (d, 1H,  $J =$   
2 9.2), 7.64 (s, 1H), 7.90 (s, 1H), 8.07 (s, 1H), 8.21-8.23 (d, 1H,  $J = 8.8$ ).

3 HR-ESI Qq-LTMS: calcd for  $[C_{38}H_{44}N_5O_{10}]^+$   $[M+H]^+ = 730.3083$ ; obsd 730.3137.

4

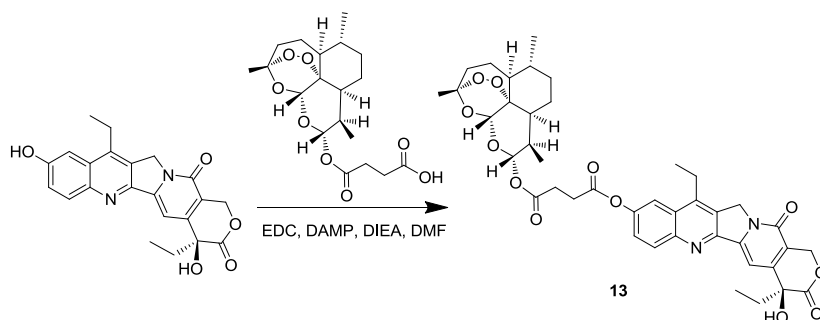

#### 6 **Supplementary Scheme 14 Synthetic scheme of 13**

7 To a solution of artesunate (19 mg, 0.051 mmol) and SN-38 (20 mg, 0.051 mmol) in 2 mL  
8 of anhydrous DMF were added EDC·HCl (12 mg, 0.056 mmol) and DMAP (8 mg, 0.056 mmol).  
9 The reaction mixture was stirred at 25 °C overnight. After removing the solvent, DCM was  
10 added and washed with washed with 5% citric acid, saturated  $NaHCO_3$  and brine. The  
11 organic layer was dried over anhydrous  $Na_2SO_4$ , filtered, and evaporated under vacuum.  
12 The residue was purified by flash column chromatography on silica gel (DCM:MeOH=50:1)  
13 to give compound **13** (23 mg, 59.5%).

14  $^1H$  NMR (400 MHz,  $CDCl_3$ ):  $\delta$  0.86-0.87 (m, 3H), 0.94-0.97 (m, 6H), 1.25-1.28 (m, 3H),  
15 1.29-1.31 (m, 2H), 1.37-1.38 (m, 4H), 1.40 (s, 2H), 1.41-1.43 (m, 3H), 1.62-1.65 (m, 2H),  
16 1.75 (m, 1H), 1.85-1.89 (m, 2H), 1.90-1.95 (m, 1H), 2.02 (s, 1H), 2.94-2.97 (t, 2H),  
17 2.98-3.07 (m, 2H), 3.15-3.20 (t, 2H), 5.27 (s, 2H), 5.28-5.32 (d, 1H,  $J = 16$ ), 5.71-5.75 (d,  
18 1H,  $J = 16.4$ ), 7.58-7.61 (d, 1H,  $J = 7.6$ ), 7.77 (s, 1H), 7.84 (s, 1H), 8.29-8.31 (d, 1H,  $J =$   
19 9.2).

20 HR-ESI Qq-LTMS: calcd for  $[C_{41}H_{46}N_2O_{12}]^+$   $[M+H]^+ = 759.3124$ ; obsd 759.3125.

21

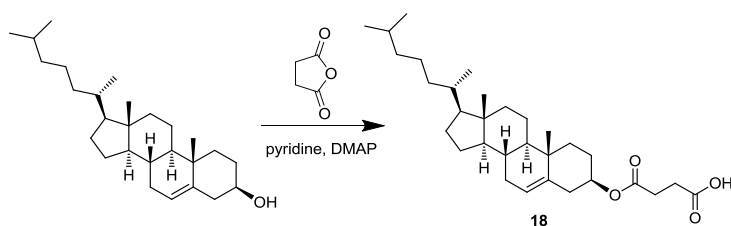

#### 23 **Supplementary Scheme 15 Synthetic scheme of 18**

24 To a solution of cholesterol (1.16 g, 3 mmol) and succinic anhydride (0.9 g, 9 mmol) in

1 10 mL of anhydrous pyridine were added DMAP (367 mg, 3 mmol). The reaction mixture  
2 was stirred at 25 °C overnight. After removing the solvent, ethyl acetate was added and  
3 washed with 0.1 N HCl and brine. The organic layer was dried over anhydrous Na<sub>2</sub>SO<sub>4</sub>,  
4 filtered, and evaporated under vacuum. The residue was purified by flash column  
5 chromatography on silica gel (DCM:MeOH=100:1) to give compound **18** (950 mg, 65%).  
6 <sup>1</sup>H NMR (400 MHz, CDCl<sub>3</sub>): δ 0.67-1.57 (m, 37H), 1.83-2.02 (m, 6H), 2.30-2.32 (m, 1H),  
7 2.60-2.62 (d, 2H, *J* = 6.8), 2.66-2.68 (d, 2H, *J* = 6.4), 5.36-5.37 (m, 1H).

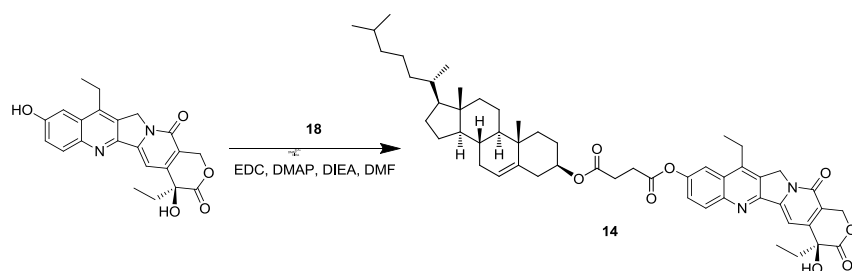

9  
10 **Supplementary Scheme 16 Synthetic scheme of 14**

11 To a solution of **18** (300 mg, 0.62 mmol) and SN-38 (241 mg, 0.62 mmol) in 18 mL of  
12 anhydrous DMF were added EDC·HCl (140 mg, 0.73 mmol) and DMAP (80 mg, 0.73 mmol)  
13 and pyridine (200 μL, 1 mmol). The reaction mixture was stirred at 25 °C overnight. After  
14 removing the solvent, DCM was added and washed with washed with 5% citric acid,  
15 saturated NaHCO<sub>3</sub> and brine. The organic layer was dried over anhydrous Na<sub>2</sub>SO<sub>4</sub>, filtered,  
16 and evaporated under vacuum. The residue was purified by flash column chromatography  
17 on silica gel (DCM:MeOH = 100:1) to give compound **14** (381 mg, 71.8%).

18 <sup>1</sup>H NMR (400 MHz, CDCl<sub>3</sub>): δ 0.64-1.59 (m, 37H), 0.95-0.98 (t, 3H), 1.32-1.43 (t, 3H),  
19 1.84-1.89 (m, 2H), 1.87-2.02 (m, 6H), 2.35-2.36 (m, 1H), 2.78-2.80 (d, 2H, *J* = 7.2),  
20 2.96-2.98 (d, 2H, *J* = 6.8), 3.11-3.16 (q, 2H), 5.05-5.15 (m, 1H), 5.23 (s, 2H), 5.26-5.30 (d,  
21 1H, *J* = 16), 5.71-5.75 (d, 1H, *J* = 16.4), 7.53-7.56 (d, 1H, *J* = 9.2), 7.64 (s, 1H), 7.80 (s, 1H),  
22 8.16-8.18 (d, 1H, *J* = 9.2).

23 HR-ESI Qq-LTMS: calcd for [C<sub>53</sub>H<sub>69</sub>N<sub>2</sub>O<sub>8</sub>]<sup>+</sup> [M+H]<sup>+</sup> = 861.5048; obsd 861.5019.

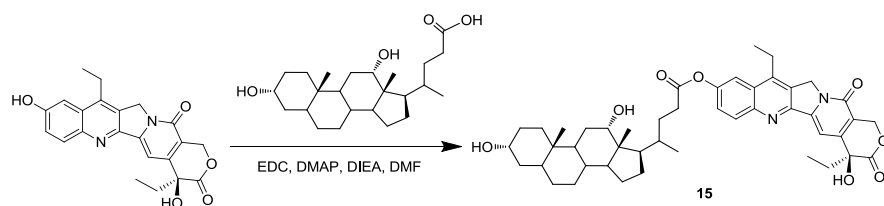

25  
26 **Supplementary Scheme 17 Synthetic scheme of 15**

1 To a solution of deoxycholic acid (300 mg, 0.76 mmol) and SN-38 (300 mg, 0.76 mmol)  
2 in 13 mL of anhydrous DMF were added EDC·HCl (160 mg, 0.84 mmol) and DMAP (103 mg,  
3 0.84 mmol) and DIEA (149  $\mu$ L, 0.84 mmol). The reaction mixture was stirred at 25  $^{\circ}$ C  
4 overnight. After removing the solvent, DCM was added and washed with washed with 5%  
5 citric acid, saturated  $\text{NaHCO}_3$  and brine. The organic layer was dried over anhydrous  
6  $\text{Na}_2\text{SO}_4$ , filtered, and evaporated under vacuum. The residue was purified by flash column  
7 chromatography on silica gel (DCM:MeOH = 30:1) to give compound **15** (267 mg, 45%).

8  $^1\text{H}$  NMR (400 MHz,  $\text{CDCl}_3$ ):  $\delta$  0.73 (s, 3H), 0.91-0.94 (t, 6H), 1.03-1.07 (t, 3H), 1.09-1.10 (m,  
9 4H), 1.26 (s, 6H), 1.39-1.43 (t, 7H), 1.53-1.59 (m, 10H), 1.77-1.81 (m, 2H), 3.16-3.18 (q,  
10 2H), 3.64-3.68 (m, 2H), 3.98-4.07 (m, 2H), 5.27 (s, 2H), 5.30-5.34 (d, 1H,  $J = 16.4$ ),  
11 5.74-5.78 (d, 1H,  $J = 16.4$ ), 7.54-7.57 (dd, 1H,  $J = 9.2, 2.8$ ), 7.66 (s, 1H), 7.825-7.832 (d,  
12 1H,  $J = 2.8$ ), 8.23-8.25 (d, 1H,  $J = 9.2$ ).

13 HR-ESI Qq-LTMS: calcd for  $\text{C}_{46}\text{H}_{59}\text{N}_2\text{O}_8$   $[\text{M}+\text{H}]^+ = 767.4266$ ; obsd 767.4259.

14  
15 The synthesis of compound **16** has been reported previously.<sup>52</sup>

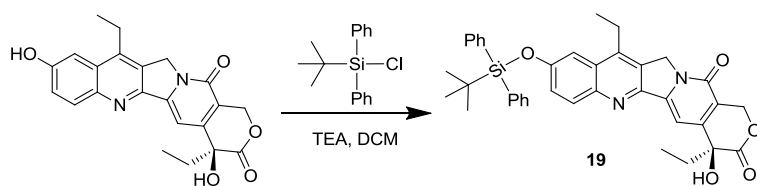

#### 17 Supplementary Scheme 18 Synthetic scheme of **19**

18 To a solution of tert-butyldiphenylchlorosilane (TBDPSCl, 2.6 mL, 10.2 mmol) and SN-38  
19 (1 g, 2.55 mmol) in 30 mL of anhydrous DCM were added TEA (1.6 mL, 11.5 mmol). The  
20 reaction mixture was reflux at 45 $^{\circ}$ C overnight and then washed with 0.1 N HCl, saturated  
21  $\text{NaHCO}_3$  and brine. The organic layer was dried over anhydrous  $\text{Na}_2\text{SO}_4$ , filtered, and  
22 evaporated under vacuum. The residue was purified by flash column chromatography on  
23 silica gel (DCM:MeOH = 200:1) to give compound **19** (1.511g, 94%).

24  $^1\text{H}$  NMR (400 MHz,  $\text{CDCl}_3$ ):  $\delta$  0.82-0.86 (t, 3H), 0.91-0.94 (t, 3H), 1.11 (s, 9H), 2.02-2.16 (m,  
25 2H), 2.59-2.64 (q, 2H), 5.08 (s, 2H), 5.26-5.30 (d, 1H,  $J = 17.6$ ), 5.57-5.61 (d, 1H,  $J = 17.2$ ),  
26 7.04 (s, 1H), 7.32-7.35 (m, 4H), 7.38-7.40 (m, 2H), 7.50-7.52 (d, 1H), 7.67-7.69 (d, 4H,  $J =$   
27 6.4), 7.95 (s, 1H), 8.32-8.33 (d, 1H,  $J = 6.8$ ).

28

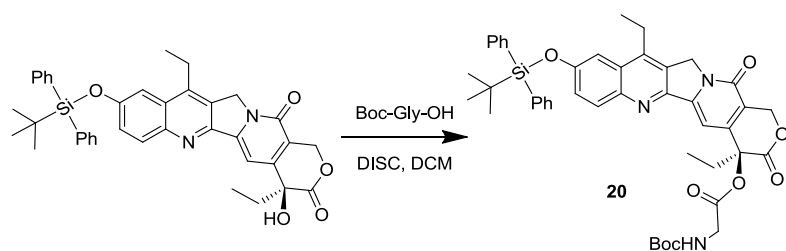

1

2 **Supplementary Scheme 19** Synthetic scheme of **20**

3 To a solution of the compound **19** (200 mg, 0.32 mmol) and Boc-Gly-OH (66.7 mg, 0.38  
 4 mmol) in 5 mL of anhydrous DCM were added DISC (52 mg, 0.38 mmol) and DMAP (39 mg,  
 5 0.32 mmol). The reaction mixture was stirred at 25°C overnight and washed with 5% citric  
 6 acid, saturated NaHCO<sub>3</sub> and brine. The organic layer was dried over anhydrous Na<sub>2</sub>SO<sub>4</sub>,  
 7 filtered, and evaporated under vacuum. The residue was purified by flash column  
 8 chromatography on silica gel (DCM:MeOH = 200:1) to give compound **16** (220 mg, 87%).  
 9 <sup>1</sup>H NMR (400 MHz, CDCl<sub>3</sub>): δ 0.87-0.91 (t, 3H), 1.00-1.03 (t, 3H), 1.07 (s, 9H), 1.17 (s, 9H),  
 10 1.59 (s, 2H), 1.84-1.90 (m, 2H), 2.27 (s, 1H), 2.61-2.67 (q, 2H), 3.70 (s, 1H), 5.10 (s, 2H),  
 11 5.25-5.29 (d, 1H, *J* = 16.0), 5.70-5.74 (d, 1H, *J* = 16.4), 7.08 (s, 1H), 7.37-7.40 (m, 6H),  
 12 7.44-7.46 (d, 1H, *J* = 7.2), 7.57 (s, 1H), 7.76-7.78 (m, 4H), 8.04-8.06 (d, 1H, *J* = 9.2).

13

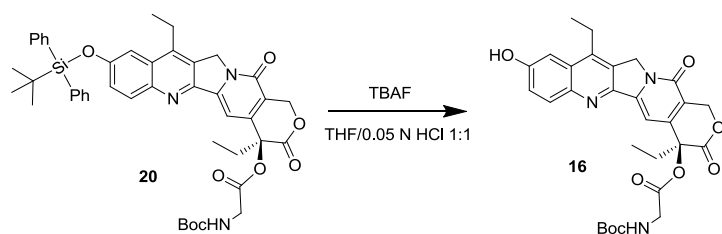

14

15 **Supplementary Scheme 20** Synthetic scheme of **16**

16 Compound **20** (122 mg, 0.15 mmol) was dissolved in a solution of TBAF (630 mg, 2.38  
 17 mmol) in a 1:1 mixture of THF and 0.05 N HCl (12.5 mL). The reaction mixture was stirred  
 18 at room temperature for 4 h. DCM was added and the target compound was extracted.  
 19 After washing with 5% citric acid and brine, the organic layer was dried over anhydrous  
 20 Na<sub>2</sub>SO<sub>4</sub>, filtered, and evaporated under vacuum. The residue was purified by flash column  
 21 chromatography on silica gel (DCM:MeOH = 100:1) to give compound **16** (66 mg, 78%).  
 22 <sup>1</sup>H NMR (400 MHz, CDCl<sub>3</sub>): δ 0.97-0.99 (t, 3H), 1.31-1.33 (t, 3H), 1.36 (s, 9H), 2.06-2.14 (m,  
 23 2H), 3.09-3.12 (q, 2H), 3.25 (bs, 1H), 5.12-5.23 (m, 2H), 5.26 (s, 2H), 5.27-5.32 (d, 1H, *J* =  
 24 17.2), 5.65-5.69 (d, 1H, *J* = 17.2), 7.46 (s, 1H), 7.56-7.58 (d, 1H, *J* = 8.0), 8.08-8.10 (d, 1H,  
 25 *J* = 8.8), 8.32 (s, 1H).



1 HR-ESI Qq-LTMS: calcd for  $[C_{29}H_{30}N_3O_8]^- [M-H]^- = 548.2038$ ; obsd 548.2096.

## 4 **Preparation and Characterization of the SN-38 Prodrug-Loaded** 5 **Nanoparticles**

6 SN-38 prodrug-loaded PEG-PLA nanoparticles were prepared by using the  
7 nanoprecipitation method. Briefly, PEG-PLA (10 mg/ml) and prodrugs (0.5 mg/ml) were  
8 dissolved in acetonitrile and together added dropwise into water, providing a final  
9 polymer concentration of 3 mg/ml. After stirring for 30 min, the remaining organic solvent  
10 was removed in a rotary evaporator at reduced pressure. The NPs were concentrated by  
11 using Amicon Ultra-4 centrifugal filters (Millipore, Mw=10,000) and washed with deionized  
12 water. Prodrug contents encapsulated in the NPs were determined by reverse phase HPLC  
13 by using a UV detector at 378 nm. The quantification of encapsulation efficiency (EE) was  
14 performed by HPLC method.

### 15 **Dynamic Light Scattering (DLS)**

16 The hydrodynamic diameters of the prodrug-loaded nanoparticles were measured on a  
17 Malvern NanoS90 instrument (Malvern Instruments, Malvern, UK) in 25°C.

### 18 **Transmission Electron Microscopy (TEM)**

19 TECNAL 10 (Philips) was used to obtain transmission electron microscopy (TEM) images,  
20 operating at an acceleration voltage of 80 kV. The sample solution of SN-38  
21 prodrug-loaded NPs at a concentration with 0.5 mg/ml (SN-38 equivalent) was placed onto  
22 a 300-mesh copper grid coated with carbon. Approximately 2 min after deposition, the  
23 surface water was removed with filter paper and then air-dried. Positive staining was  
24 performed using a 2 wt % aqueous uranyl acetate solution.

### 26 **In Vitro Active SN-38 Release Assay**

27 To evaluate the in vitro release profile of prodrugs **6**, **7**, **8**, **12**, and **13** from the PEG-PLA  
28 nanoparticles, NPs with 0.1 mg/mL prodrug loaded were dialyzed against phosphate buffer  
29 solutions (PBS, pH 7.4, 0.2% tween 80). The dialysis tubes (Spectrum, molecular weight  
30 cutoff 6-8 kDa) were continuously stirred in an orbital shaking water bath at 37°C. At  
31 pre-determined time intervals, the release media were collected and the fresh media  
32 were supplemented. The amounts of released active SN-38 were determined by HPLC  
33 analysis. The percentage of SN-38 released from the NPs was plotted against time and the

1 cumulative amount of SN-38 was calculated.

## 3 **Cell Culture**

4 Human colon carcinoma cell line HCT-116, SW480, A549 cells were maintained in RPMI  
5 medium 1640. MCF-7 cells were grown in Minimum essential medium (MEM). All media  
6 were supplemented with 10% (v/v) heat-inactivated fetal calf serum (FBS) (56 °C, 30min),  
7 penicillin (100 µg/mL) and streptomycin (100 µg/mL). Cells were maintained in a humid  
8 atmosphere at 37 °C with 5% CO<sub>2</sub>.

## 10 **Cytotoxicity assay (MTT)**

11 The cells were plated in flat-bottomed 96-well plates (5000 cells/well) and incubated at  
12 37 °C for 24 h. The cells were added by serial dilution of CPT-11, free SN-38 and  
13 prodrug-loaded NPs and further incubated for 48h. At the end of the exposure, each well  
14 was added by 30 µL MTT solution (5 mg/ml in PBS). After incubating for 4 h in a humidified  
15 atmosphere at 37 °C with 5% CO<sub>2</sub>, the MTT solution was removed from the wells, and the  
16 purple MTT-formazan crystals were dissolved by addition of 100 µL DMSO. The absorbance  
17 in each individual well was determined at 490 nm on a SynergyHT platereader (BioTek,  
18 Winooski, VT, USA).

## 20 **Apoptosis induced by SN-38 and Prodrug-loaded NPs Using Flow Cytometric 21 Analysis**

22 HCT-116 cells were seeded at a density of  $1 \times 10^6$  cells/mL on each well of a six well plate  
23 and allowed to grow overnight. Medium was changed and the cells were incubated with  
24 SN-38 (3 µM) and prodrug **6**, **7**, **8**, **12**, **13**-loaded NPs (3 µM SN-38 equivalent) for 12 or 24 h  
25 at 37 °C, respectively. The cells without drug treatment were used as a control. Cells were  
26 harvested from adherent cultures by trypsinization. Following centrifugation at 1000 rpm  
27 for 5 min, cells were washed with cold PBS repeatedly. For apoptosis analysis, an Alexa  
28 Fluor<sup>®</sup> 488 annexin V and propidium iodide (PI) apoptosis detection kit was used according  
29 to the manufacture's protocol. Briefly, treated and untreated cells ( $1 \times 10^5$ ) were suspended  
30 in 1 x annexin V binding buffer (100 µL) (10 mM HEPES, 140 mM NaCl, 2.5 mM CaCl<sub>2</sub>, pH 7.4),  
31 then 5 µL Alexa Fluor<sup>®</sup> 488 annexin V and 1 µL PI (100 µg/mL) were added to each sample  
32 and incubated at room temperature for 15 min. After then, more binding buffer (400 µL)  
33 was added while gently mixing. The samples were kept on ice prior to analysis with the BD

1 FACSCanto™ II flow cytometer.

### 3 **Animal Studies**

4 BALB/c nude mice (5 weeks old) were used in animal studies and were purchased from  
5 Shanghai Experimental Animal Centre, Chinese Academy of Science. All studies on mice  
6 were conducted in accordance with the National Institute Guide for the Care and Use of  
7 Laboratory Animal. They were housed under aseptic conditions and given autoclaved  
8 rodent diet and sterile water.

9 Human colon carcinoma HCT-116 cells were grown to 80% confluence in 90 mm tissue  
10 culture dishes. After harvesting, cells were suspended in PBS at 4°C to a final  
11 concentration of  $2.5 \times 10^7$  cells/mL. Mice were subcutaneous injection with 200 µL cell  
12 suspension containing  $5 \times 10^6$  cells in a 1 mL disposable syringe. After the tumor reached  
13  $\sim 100 \text{ mm}^3$  in volume, 14 days after transplantation, the animals were randomized into six  
14 groups.

15 The mice were treated by administering saline and Irinotecan (CPT-11) as controls, and  
16 prodrug-loaded NPs every three days intravenously in 200 µL at a dose of 10 mg/kg. Tumor  
17 growth and body weight were monitored and recorded every three days. The length (*L*)  
18 and width (*W*) of tumors were measured with calipers and tumor volume was calculated  
19 using the following formula:  $V = (L \times W^2)/2$ , with *W* being smaller than *L*. Mice were  
20 sacrificed by CO<sub>2</sub> inhalation when their tumors reached the 1500 mm<sup>3</sup> endpoint value or  
21 after 3 weeks.

### 23 **Statistical Analysis**

24 All quantitative data are presented as means  $\pm$  SD of three independent experiments. The  
25 statistical significance of compared measurements was evaluated using the two-tailed  
26 unpaired Student's t test. A *P*-value less than 0.05 was considered as statistically  
27 significant, while a *P*-value less than 0.01 was considered as highly significant.

1 **References**

- 2 S1. Y. Zhang, L. C. Gold, Tocopherol modified therapeutic drug compounds,  
3 U.S. Pat. Appl. Publ. (2008), 67pp.
- 4 S2. H. Zhao, B. Rubio, P. Sapra, D. Wu, P. Reddy, P. Sai, A. Martinez, Y. Gao, Y.  
5 Lozanguiez, C. Longley, L. M. Greenberger, I. D. Horak, *Bioconjugate Chem.*  
6 **2008**, *19*, 849-859.
